# Viral evolutionary dynamics predict Influenza-Like-Illnesses in patients

Christopher D. Wallbank,<sup>1</sup> and Stéphane Aris-Brosou<sup>1,2,\*</sup>

<sup>1</sup>Department of Biology, University of Ottawa, Ottawa, ON K1N 6N5, Canada

<sup>2</sup>Department of Mathematics and Statistics, University of Ottawa, Ottawa, ON K1N  
6N5, Canada

\*Correspondence: [sarisbro@uottawa.ca](mailto:sarisbro@uottawa.ca)

## 1 **Abstract**

2 Viral infections such as those caused by the influenza virus can put a strain on healthcare  
3 systems. However, such a burden is typically difficult to predict. In order to improve  
4 such predictions, we hypothesize that the severity of epidemics can be linked to viral  
5 evolutionary dynamics. More specifically, we posit the existence of a negative association  
6 between patients' health and the stability of coevolutionary networks at key viral proteins.  
7 To test this, we performed a thorough evolutionary analysis of influenza viruses circulating  
8 in continental US between 2010 and 2019, assessing how measures of the stability of these  
9 coevolutionary networks correlate with clinical data based on outpatient healthcare visits  
10 showing Influenza-Like Illness (ILI) symptoms. We first show evidence of a significant  
11 correlation between viral evolutionary dynamics and increased influenza activity during  
12 seasonal epidemics, and then show that these dynamics closely follow the progression of  
13 epidemics through each season, providing us with predictive power based on genetic data  
14 collected between week 20 and week 40/52, that is one to fifteen weeks prior to peak ILI.  
15 Viral evolutionary dynamics may hence be used by health authorities to further guide  
16 non-pharmaceutical interventions.

17 **Key words:** influenza virus; hemagglutinin; neuraminidase; coevolution; network analy-  
18 sis; ILI.

## 19 **1 Introduction**

20 Recent human history has been repeatedly plagued by viral outbreaks such as the 1918  
21 H1N1 “Spanish flu” (Kilbourne, 2006), or the novel 2009 H1N1 pandemic (Smith *et al.*,  
22 2009) – pandemics that aggravate the already heavy burden of seasonal epidemics, esti-  
23 mated to be as high as 650,000 deaths globally (Paget *et al.*, 2019). In any case however,  
24 these numbers are hard to predict ahead of/or as the outbreak unfolds. While standard  
25 epidemiological models can inform us on which non-pharmaceutical intervention works  
26 best to limit casualties (Davies *et al.*, 2020), and while phylodynamics can reveal the  
27 genetic structure of an epidemic (du Plessis *et al.*, 2021), models predicting the next viral  
28 strain have shown little predictive power (Sandie and Aris-Brosou, 2014), and approaches  
29 predicting burden on healthcare systems are scarce.

30 The case of influenza might help in this regard, as both the World Health Organization  
31 (WHO, 2020) and the Centers for Disease Control and Prevention (CDC, 2019a) closely  
32 monitor influenza activity in humans worldwide, in particular in the US. To this effect,  
33 the CDC enrolls around 3,000 healthcare providers that report numbers and percentages  
34 of patients showing symptoms of Influenza-Like-Illnesses (ILI), defined as a fever (a tem-  
35 perature  $\geq 37.8^{\circ}\text{C}$ ) and a cough and/or sore throat, on a weekly basis, since the 1997-98  
36 influenza season (CDC, 2019b). These weekly updates report, among others, ILI values  
37 that represent the number of patients with ILI divided by the total number of patients  
38 seen, which hence stands for a good indicator of ILI burden on the healthcare system.  
39 These data are then aggregated by state for all 50 states, plus the District of Columbia,  
40 Puerto Rico, and the US Virgin Islands, and are available since the 2010-11 season, start-  
41 ing right after the emergence of the pandemic 2009 H1N1 strain (CDC, 2019b). In parallel  
42 to these clinical data is a wealth of sequence data deposited in public repositories such

43 as GenBank (Bao *et al.*, 2008), where the data can be filtered by country, season (from  
44 week 40 to week 39 of the following year), influenza subtype, host, and gene. Information  
45 about the state where each sequence was collected is available through the name of each  
46 sequence. It is therefore possible to match, in an aggregated manner, clinical and genetic  
47 data on a state by state basis, as well as on a weekly basis since 2010-11, and hence to test  
48 for the existence of genetic predictors of ILI burden. The outstanding question remains  
49 as to which genetic predictors to use for this purpose.

50 Previous work suggests that outbreaks and epidemics affect the evolutionary dynamics  
51 of select viruses: more specifically, outbreaks were found to be associated with a break-  
52 down of coevolving amino acid, leading to what was characterized as a destabilization of  
53 their coevolutionary networks (Aris-Brosou *et al.*, 2017). This result is sensible as exper-  
54 imental evidence shows that influenza viruses evolve in such a way that when some amino  
55 acid sites mutate, there may be a compensatory mutation (Gong *et al.*, 2013). When  
56 many amino acids interact in such a way, they are considered to evolve in a correlated  
57 manner, often forming networks of coevolving residues (Nshogozabahizi *et al.*, 2017), net-  
58 works that are not limited to viruses as they are also found in bacteria (Dench *et al.*,  
59 2020). These networks are thought to stabilize a genome from an evolutionary point of  
60 view (Aris-Brosou *et al.*, 2019), a stability that is compromised during an outbreak, po-  
61 tentially because of a lack of compensatory mutations. Because this previous work was  
62 limited to case studies, it remains unclear whether such associations can be generalized,  
63 and more critically how they translate in the clinic. To address this outstanding issue,  
64 we tested for the existence of a correlation between viral evolutionary dynamics and ILI  
65 burden, focusing on the analysis of the two main influenza antigens, the hemagglutinin  
66 and the neuraminidase genes, whose products are respectively involved in cell entry and  
67 exit of viral particles (Nelson and Holmes, 2007), found in the two subtypes commonly

68 circulating in humans since 1968: H1N1 and H3N2. Our prediction was that if Influenza  
69 activity is indeed linked to destabilization, then the coevolving amino acid networks that  
70 are most disconnected should match to high Influenza levels in that state and season.  
71 Through a time window analysis, we show that maximum predictive power is reached  
72 when analyzing genetic data collected between week 20 and week 52, two to four weeks  
73 prior to peak ILI activity.

## 74 **2 Materials and Methods**

### 75 **2.1 Data retrieval**

76 Unweighted ILI data (*i.e.*, the percentage of cases of Influenza that tested positive as  
77 reported by contributing healthcare providers) were retrieved from the CDC website us-  
78 ing the FluView portal at [gis.cdc.gov/grasp/fluview/fluportaldashboard.html](https://gis.cdc.gov/grasp/fluview/fluportaldashboard.html), for  
79 each weekly report dating from October 4, 2010, the first available date in the report and  
80 the start of the 2010-11 season, through March 10, 2020, or about two-thirds of the last  
81 season. These data were first summarized for each state and for each season by the mean  
82 ILI.

83 Corresponding hemagglutinin and neuraminidase coding sequences were retrieved from  
84 the NCBI Influenza database (Bao *et al.*, 2008) for the same range of dates for viruses  
85 circulating in the US. Only “full length plus” sequences, that may be missing start/stop  
86 codons, with complete collection dates, including pandemic H1N1 sequences were down-  
87 loaded. Identical sequences were kept, as those could have been collected in different  
88 states. Altogether, this led us to retrieve 5,292 HA and 9,386 NA sequences for H1N1,  
89 and 16,499 HA and 14,423 NA sequences for H3N2.

## 90 **2.2 Phylogenetic analyses**

91 These four datasets were then aligned using Muscle ver. 3.8.31 (Edgar, 2004). Upon  
92 visual inspection, sequences that appeared misaligned were deleted, and indels caused  
93 by sequencing errors were removed. FastTree ver. 2.1.1 (Price *et al.*, 2010) was used to  
94 generate a first phylogenetic tree for each of the four datasets, assuming the General Time-  
95 Reversible + $\Gamma$  model of evolution (*e.g.*, Aris-Brosou and Rodrigue, 2019). Sequences with  
96 extreme branch lengths were removed, leaving us with 5,288 HA and 9,331 NA sequences  
97 for H1N1, and 16,493 HA and 14,403 NA sequences for H3N2.

98 As we focused exclusively on the continental US, the “lower 48’s”, we removed all  
99 sequences collected in Alaska, Hawaii, the Virgin Islands, and the District of Columbia  
100 based on the sequence names. We corrected spelling errors, resolved city names to their  
101 state name, removed environmental sequences and sequences with odd locations that  
102 were not matching a correct state name. Remained for the final analyses 4,474 HA and  
103 8,530 NA sequences for H1N1, and 15,197 HA and 13,147 NA sequences for H3N2. The  
104 four datasets were then split into sub-alignments by state and by season, an influenza  
105 season running from week 40 to week 39 of the following year, hence generating at most  
106  $48 \times 12 = 576$  state- and season-specific alignments for each gene and each subtype.

## 107 **2.3 Reconstruction of networks of coevolving sites**

108 For each gene and subtype, these 576 alignments were analyzed as above with FastTree  
109 to create phylogenetic trees, that were mid-point rooted with Phytools ver. 0.2.2 (Revell,  
110 2012), and node labels (aLRT SH-like support values) were removed as they caused parsing  
111 errors at the next stage. HyPhy ver. 2.3.3 (Pond *et al.*, 2004) was then employed to infer  
112 co-evolving residues with a modified SpiderMonkey (Poon *et al.*, 2008) script (available

113 from [github.com/sarisbro](https://github.com/sarisbro)). Briefly, the MG94×HKY85 codon substitution model was  
114 used to reconstruct non-synonymous substitutions in the codon sequences at each node  
115 of the tree. These reconstructions were then transformed to a binary matrix, where  
116 rows and columns represent the unique branches and amino acid positions, respectively.  
117 A Bayesian Graphical Model (BGM) was then used to find the pairs of sites that find  
118 evidence of correlated evolution. Each node represents a codon, and edges originating  
119 from a node represent a correlated relationship best explaining the data (a parent node  
120 having influence over a child node). To prevent overcomplicating the BGM, a maximum  
121 of two parents was assumed for any child. This dependence was estimated for each pair  
122 of codons by its posterior probability, itself inferred using a Markov chain Monte Carlo  
123 (MCMC) sampler that was run for 1,000,000 steps. A burn-in of 10,000 steps was assumed  
124 to be long enough to reach stationarity, and a total of 9,900 samples were evenly taken  
125 in what remained of each chain. To check for convergence, each MCMC sampler was  
126 run twice, and all downstream analyses were hence performed on each replicate, hence  
127 globally assessing the robustness of our results to sampler convergence. The two smaller  
128 temporal analyses had convergence issues and therefore were run for  $10^6$  steps, with a  
129 burn-in of  $5 \times 10^5$  steps, and sampling a total of 95,000 samples

130 The igraph package ver. 1.2.4.2 (Csardi and Nepusz, 2006) was then used to create  
131 the networks of co-evolving residues, and to compute the network summary statistics:  
132 diameter (the maximum average greatest distance between any two nodes), average path  
133 length (the mean length of every potential path between any two nodes), betweenness  
134 (how often a node is included in all the shortest paths between two other nodes).  $\alpha$   
135 centrality (a measure of the influence of nodes over others), assortativity (testing whether  
136 or not nodes that are similar are likely to be connected), dyad census (a classification of  
137 the relationship for every pair of nodes), transitivity (probability that adjacent vertices

138 are connected), and mean eccentricity (the average greatest distance between any two  
139 nodes). These network summary statistics were calculated over a series of 100 posterior  
140 probability thresholds  $\in (0.1, 0.99)$ , representing weak to strong evidence for co-evolution.

## 141 **3 Results and Discussion**

### 142 **3.1 Whole-season predictors of ILI**

143 First, in order to test for the existence of a global correlation between viral evolutionary  
144 dynamics and ILI, we analyzed state-specific and season-specific sequence alignments for  
145 the HA and the NA genes from H1N1 (the pandemic strain) and H3N2 subtypes between  
146 the 2010-11 and 2019-20 seasons. Note that while it can be expected that these sequences  
147 are unevenly collected through time and across states, we could not find any sequence  
148 in the database for HA in H1N1 for the last three seasons surveyed, 2017-18 to 2019-20  
149 (Fig. S1-S2).

150 In all cases, these analyses included data running from week 40 of a given year to  
151 week 39 of the following year, dates that reflect the official start and the end of influenza  
152 seasons, as can be shown either by non-aggregated data (Fig. S3), or with the weekly-  
153 aggregated ILI values derived from the WHO (Fig. 1A). After alignment, these sequence  
154 were subjected to a phylogenetic reconstruction to detect pairs of (codon) sites evolving  
155 in a correlated manner based on Bayesian Graphical Models (BGMs; Poon *et al.*, 2008).  
156 Convergence of the BGMs was assessed based on the estimated posterior probabilities  
157 from two independent runs (Fig. S4). Such pairs of sites have previously been shown  
158 to form networks (Nshogozabahizi *et al.*, 2017; Dench *et al.*, 2020), that can then be  
159 analyzed based on statistics used in social network analyses such as average path length  
160 or eccentricity (Newman, 2018). Here we computed eleven such statistics, and used them



161 first to further assess the convergence of the MCMC samplers used by the BGMs, running  
162 each analysis twice. Our results show that for all statistics, except for  $\alpha$ -centrality of HA  
163 in H1N1, both runs lead to almost identical results (Fig. S5).

164 From previous work comparing non-pandemic and pandemic viruses, we expected  
165 that with increasing ILI, the diameter, average path length, eccentricity, and betweenness  
166 would decrease, while transitivity would increase, in particular for weakly interacting sites  
167 (around a posterior probability  $PP = 0.25$ , Aris-Brosou *et al.*, 2017). Our results here  
168 generally support these previous findings, in that we observe significant and negative corre-  
169 lations between network statistics and total ILI values for diameter (Fig. 1B), average path  
170 length (Fig. 1C), betweenness (Fig. 1D), as predicted, but also for  $\alpha$ -centrality (Fig. 1E),  
171 assortative degree (Fig. 1F) and dyad (Fig. 1G). Among these, HA in H3N2 almost sys-  
172 tematically shows a negative correlation at weak evidence for coevolution ( $PP \approx 0.25$ ),  
173 while NA for H1N1 shows a negative correlation at stronger evidence for coevolution  
174 ( $PP \approx 0.75$ ). Altogether, these negative correlations imply that amino acid residues are  
175 coevolving less as ILI increases, so that coevolutionary networks tend to dissociate. On  
176 the other hand, transitivity and mean eccentricity show positive correlations with total  
177 ILI for NA in H1N1 and H3N2, respectively (Fig. 1H-I). These statistics indicate that  
178 networks become smaller as ILI increases. Altogether, these results show that, mainly  
179 for NA in H1N1 and HA in H3N2, an increase in ILI is associated with a disruption of  
180 the coevolutionary dynamics at these two antigens, which, again, is consistent with our  
181 previous results (Aris-Brosou *et al.*, 2017).

## 182 **3.2 Look-ahead predictors of ILI**

183 To go beyond mere associations between network structures and ILI during an entire  
184 season, and to assess the utility of the above results in terms of public health, we split

185 the sequence data into four different and overlapping temporal windows, beginning before  
186 the official start of each season to assess carryover effects: window 1 ran from week 20  
187 (20 weeks before the start of the season – this is approximately when sequences deposited  
188 in GenBank start accumulating) to week 30 (10 weeks before the start of the season),  
189 window 2 ran from week 20 to week 40 (the official start of the focal season), window  
190 3 from week 20 to week 52 (end of calendar year), and window 4 spanned weeks 20-  
191 10. We elected to start each analysis from week 20 as by then, epidemics are usually  
192 almost over (Fig. 1A), and data-deposition in GenBank reaches its nadir or lowest rate  
193 (Fig. S5). Because H3N2 is usually the subtype most impacting human populations since  
194 its emergence in 1968 (Jester *et al.*, 2020), HA and NA sequences from this subtype are  
195 about twice as abundant as for H1N1 in GenBank (Fig. S5). Furthermore, because of  
196 the missing H1N1 HA sequences for the past three seasons (Fig. S1), our data contained  
197 fewer HA than NA sequences for H1N1, when it is this latter gene sequences that are  
198 usually less sequenced (Fig. S5B). As a result, we focused the temporal analyses on H3N2  
199 exclusively, for both HA and NA. In each case, we used genetic data coming from each  
200 time window to predict the mean ILI for the *entire* focal season.

201 Window 1 should serve as a control, as it starts and ends before the start of the focal  
202 season, and hence should not have accumulated enough genetic data to have any predictive  
203 value with respect to ILI (Fig. 2A). As expected, none of the network statistics showed any  
204 significance at the 1% level, except dyad census for NA, which was negatively predicting  
205 upcoming ILI at moderately interacting residues (Fig. 2B-I), and should henceforth be  
206 interpreted with care.

207 From window 2 onward, the results are expected to be more meaningful, as they  
208 represent a catchment of genetic data directly leading up to the focal season. Indeed,  
209 from this point on, HA shows the strongest and most consistent predictive value over a

210 number of network statistics, with temporal trends as we move across windows. More  
211 specifically, diameter is first a positive predictor of ILI for HA and NA (Fig. 3B), but as  
212 genetic data accumulate, diameter becomes a negative predictor (Fig. 4B and Fig. 5B).  
213 This again is highly consistent with our previous results, where during a severe outbreak,  
214 networks of coevolving residues become destabilized, and regain stability over time (Aris-  
215 Brosou *et al.*, 2017).

216 Likewise, average path length goes from showing no relationship with ILI for sequences  
217 sampled 10 weeks prior to the start of the season (Fig. 2C), to progressively  
218 showing a more negatively significant trend as we accumulate sequence data through the  
219 course of the season, and coevolutionary networks are dislocating. Notably, these networks  
220 start by dislocating at weakly coevolving residues (Fig. 3C:  $PP \approx 0.20$ ), and the stronger  
221 interactions are progressively affected (Fig. 4C:  $PP \approx 0.30$ ; Fig. 5C:  $PP \approx 0.60$ ). To  
222 some extent, the same behavior is observed for betweenness (Fig. 3D:  $PP \approx 0.20$ ; Fig. 4D:  
223  $PP \approx 0.30$ ; Fig. 5D:  $PP \approx 0.60$ ), and alpha centrality (only late in the season: Fig. 5E:  
224  $PP \geq 0.60$ ). For reasons that are as of yet unexplained, only HA is affected by this trend:  
225 NA exhibits no pattern at all.

226 Similar dynamics are observed for betweenness (from no association to negative to  
227 no association for HA: Fig. 2D-Fig. 4D), alpha centrality (from no association to positive  
228 to slightly negative for HA: Fig. 2E-Fig. 4E), assortative degree (from no association to  
229 positive to no association for HA: Fig. 2F-Fig. 4F), dyad (from no association to briefly  
230 positive to no association for HA: Fig. 2G-Fig. 4G), transitivity (from no association to  
231 positive to almost no association for HA: Fig. 2H-Fig. 4H), and eccentricity (from no  
232 association to positive to no association for HA: Fig. 2I-Fig. 4I). Taken altogether, these  
233 results show that networks are destabilized with increasing ILI (smaller diameter) as the  
234 epidemic is reaching its peak, and they regain a certain stability at the end of the season,

235 when in-clinic visits plummet. More to the point, these results show that our maximum  
236 predictive power is reached when analyzing genetic data collected between week 20 and  
237 40-to-52, that is to say one to fifteen weeks prior to peak ILI burden, which is usually  
238 between December and February (Figure 1A; Paget *et al.*, 2007; Murray *et al.*, 2018).

### 239 **3.3 Conclusions**

240 We here showed the existence of an association between the evolutionary dynamics of in-  
241 fluenza viruses circulating seasonally in humans and the public health burden caused by  
242 this virus in the continental US. More specifically, we showed that network statistics sum-  
243 marizing the level of correlated evolution, and hence evolutionary constraints, affecting  
244 the main influenza antigens are associated with the clinical burden due to influenza-like  
245 illnesses. With a time-window analysis, we further show that these networks of coevolving  
246 residues become destabilized, and regain stability over time (Aris-Brosou *et al.*, 2017).

247 While the time-window analyses suggest such a seasonal dynamics, causality is far from  
248 being obvious. At our level of granularity, it is indeed impossible to identify the drivers of  
249 these associations, without also having phenotypic data on virulence and transmissibility  
250 of these viruses. Potentially more problematic here is the use and nature of ILI values.  
251 By reducing these values to their mean by state by season to represent the entire season,  
252 we neglect temporal variation, cumulative ILI values, or maybe more critically maximum  
253 ILI values that undoubtedly have a dire impact on health systems. One serious limitation  
254 however is that ILI values, irrespective of how they are summarized, do not allow us  
255 to tease viral subtypes apart: to alleviate this issue, we limited our analyses to H3N2,  
256 assuming that being the prevalent subtype in most seasons (Jester *et al.*, 2020), ILI values  
257 will most likely reflect clinic visits due to H3N2, but there is no means of checking the  
258 validity of this assumption. Using data that separate ILI by subtype would also be helpful

259 for future analysis. One such database with this capacity would be the WHO/NREVSS  
260 (WHO/NREVSS, 2020).

261 From a purely pragmatic point of view, our results essentially mean that some of  
262 these statistics such as network diameter predict ILI values, one to fifteen ahead of peak  
263 influenza season in terms of outpatient visits to a clinic. This is a short lead, but one  
264 that could henceforth be used routinely to predict ILI burden on the healthcare system,  
265 and therefore help plan resource allocations and shifts – and put new non-pharmaceutical  
266 interventions into place to curb transmission in the first place (Davies *et al.*, 2020).

## 267 **Data availability**

268 The data assembled and the code developed for this work are available from [github.com/  
269 sarisbro/data](https://github.com/sarisbro/data).

## 270 **Supplementary data**

271 Supplementary data are available at Virus Evolution online.

## 272 **Acknowledgements**

273 We thank Compute Canada for providing us with compute time on their servers.

## 274 **Funding**

275 SAB was supported by the Natural Sciences Research Council of Canada.

## 276 **References**

277 Aris-Brosou, S. and Rodrigue, N. 2019. A not-so-long introduction to computational  
278 molecular evolution. *Methods Mol Biol*, 1910: 71–117.

279 Aris-Brosou, S., Ibeh, N., and Noël, J. 2017. Viral outbreaks involve destabilized evolu-  
280 tionary networks: evidence from Ebola, Influenza and Zika. *Sci Rep*, 7(1): 11881.

281 Aris-Brosou, S., Parent, L., and Ibeh, N. 2019. Viral long-term evolutionary strategies  
282 favor stability over proliferation. *Viruses*, 11(8).

283 Bao, Y., Bolotov, P., Dernovoy, D., Kiryutin, B., Zaslavsky, L., Tatusova, T., Ostell,  
284 J., and Lipman, D. 2008. The influenza virus resource at the National Center for  
285 Biotechnology Information. *J Virol*, 82(2): 596–601.

286 CDC 2019a. Fluview. Accessed October 18, 2019.

287 CDC 2019b. US influenza surveillance system: Purpose and methods. Accessed March  
288 30, 2020.

289 Csardi, G. and Nepusz, T. 2006. The igraph software package for complex network  
290 research. *InterJournal*, Complex Systems: 1695.

291 Davies, N. G., Kucharski, A. J., Eggo, R. M., Gimma, A., Edmunds, W. J., and Centre  
292 for the Mathematical Modelling of Infectious Diseases COVID-19 working group 2020.  
293 Effects of non-pharmaceutical interventions on COVID-19 cases, deaths, and demand  
294 for hospital services in the UK: a modelling study. *Lancet Public Health*, 5(7): e375–  
295 e385.

296 Dench, J., Hinz, A., Aris-Brosou, S., and Kassen, R. 2020. Identifying the drivers of

- 297 computationally detected correlated evolution among sites under antibiotic selection.  
298 *Evol Appl*, 13(4): 781–793.
- 299 du Plessis, L., McCrone, J. T., Zarebski, A. E., Hill, V., Ruis, C., Gutierrez, B., Ragh-  
300 wani, J., Ashworth, J., Colquhoun, R., Connor, T. R., Faria, N. R., Jackson, B.,  
301 Loman, N. J., O’Toole, Á., Nicholls, S. M., Parag, K. V., Scher, E., Vasylyeva, T. I.,  
302 Volz, E. M., Watts, A., Bogoch, I. I., Khan, K., COVID-19 Genomics UK (COG-UK)  
303 Consortium, Aanensen, D. M., Kraemer, M. U. G., Rambaut, A., and Pybus, O. G.  
304 2021. Establishment and lineage dynamics of the SARS-CoV-2 epidemic in the UK.  
305 *Science*.
- 306 Edgar, R. 2004. Muscle: multiple sequence alignment with high accuracy and high  
307 throughput. *Nucleic Acids Res*, 32(5): 1792–97.
- 308 Gong, L., Suchard, M., and Bloom, J. 2013. Stability-mediated epistasis constrains the  
309 evolution of an influenza protein. *Elife*, 2.
- 310 Jester, B. J., Uyeki, T. M., and Jernigan, D. B. 2020. Fifty years of influenza A(H3N2)  
311 following the pandemic of 1968. *Am J Public Health*, 110(5): 669–676.
- 312 Kilbourne, E. D. 2006. Influenza pandemics of the 20th century. *Emerging Infectious*  
313 *Diseases*, 12(1): 9–14.
- 314 Murray, J. L. K., Marques, D. F. P., Cameron, R. L., Potts, A., Bishop, J., von Wissmann,  
315 B., William, N., Reynolds, A. J., Robertson, C., and McMenamin, J. 2018. Moving  
316 epidemic method (MEM) applied to virology data as a novel real time tool to predict  
317 peak in seasonal influenza healthcare utilisation. the Scottish experience of the 2017/18  
318 season to date. *Euro Surveill*, 23(11).

- 319 Nelson, M. I. and Holmes, E. C. 2007. The evolution of epidemic influenza. *Nat Rev*  
320 *Genet*, 8(3): 196–205.
- 321 Newman, M. 2018. *Networks*. Oxford university press.
- 322 Nshogozabahizi, J. C., Dench, J., and Aris-Brosou, S. 2017. Widespread historical con-  
323 tingency in influenza viruses. *Genetics*, 205(1): 409–420.
- 324 Paget, J., Marquet, R., Meijer, A., and van der Velden, K. 2007. Influenza activity  
325 in europe during eight seasons (1999-2007): an evaluation of the indicators used to  
326 measure activity and an assessment of the timing, length and course of peak activity  
327 (spread) across europe. *BMC Infect Dis*, 7: 141.
- 328 Paget, J., Spreeuwenberg, P., Charu, V., Taylor, R. J., Iuliano, A. D., Bresee, J., Si-  
329 monsen, L., and Viboud, C. 2019. Global mortality associated with seasonal influenza  
330 epidemics: New burden estimates and predictors from the glamor project. *Journal of*  
331 *global Health*, 9(2): 020421.
- 332 Pond, S. L. K., Frost, S. D. W., and Muse, S. V. 2004. HyPhy: hypothesis testing using  
333 phylogenies. *Bioinformatics*, 21(5): 676–79.
- 334 Poon, A., Lewis, F., Frost, S., and Pond, S. 2008. Spidermonkey: rapid detection of  
335 co-evolving sites using bayesian graphical models. *Bioinformatics*, 24(17): 1949–50.
- 336 Price, M., Dehal, P., and Arkin, A. 2010. Fasttree 2 – approximately maximum-likelihood  
337 trees for large alignments. *PLOS ONE*, 5(3): 1–10.
- 338 Revell, L. 2012. phytools: An R package for phylogenetic comparative biology (and other  
339 things). *Methods in Ecology and Evolution*, 3: 217–23.



- 340 Sandie, R. and Aris-Brosou, S. 2014. Predicting the emergence of H3N2 influenza viruses  
341 reveals contrasted modes of evolution of HA and NA antigens. *J Mol Evol*, 78(1): 1–12.
- 342 Smith, G., Vijaykrishna, D., Bahl, J., Lycett, S., Worobey, M., Pybus, O., Ma, S., Cheung,  
343 C., Raghvani, J., Bhatt, S., Peiris, J., Guan, Y., and Rambaut, A. 2009. Origins and  
344 evolutionary genomics of the 2009 swine-origin H1N1 Influenza A epidemic. *Nature*,  
345 459: 1122–25.
- 346 WHO 2020. The global influenza programme. Accessed March 2020.
- 347 WHO/NREVSS 2020. National respiratory and enteric virus surveillance system. Ac-  
348 cessed April 14, 2020.

349 **Figures**

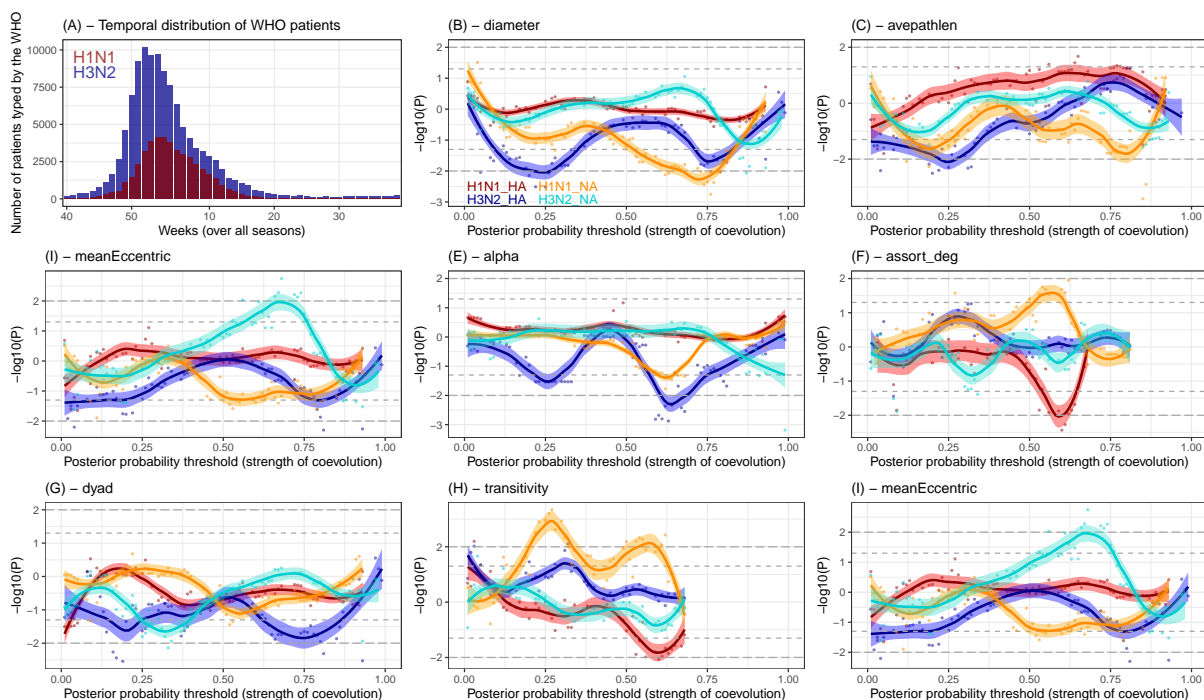

**Figure 1. Network analyses based on genetic data from the entire season for the HA and NA genes in H1N1 and H3N2 subtypes.** (A) Distribution of unweighted ILI values summed per week over the entire nine seasons, from 2010-11 to 2018-19 based on WHO data for H1N1 (dark red) and H3N2 (dark blue). The next eight panels show the significance of the robust regressions for each network statistic at a particular posterior probability threshold (the strength of coevolution) against total unweighted ILI value. Negative values indicate a negative slope, and vice-versa for positive values. Gray horizontal lines indicate significance thresholds (dash: 5%; long dash: 1%). LOWESS regressions are shown with the 95% confidence envelope for each subtype and each gene: warm colors for H1N1 (red for HA, orange for NA) and cold colors for H3N2 (blue for HA, turquoise for NA).

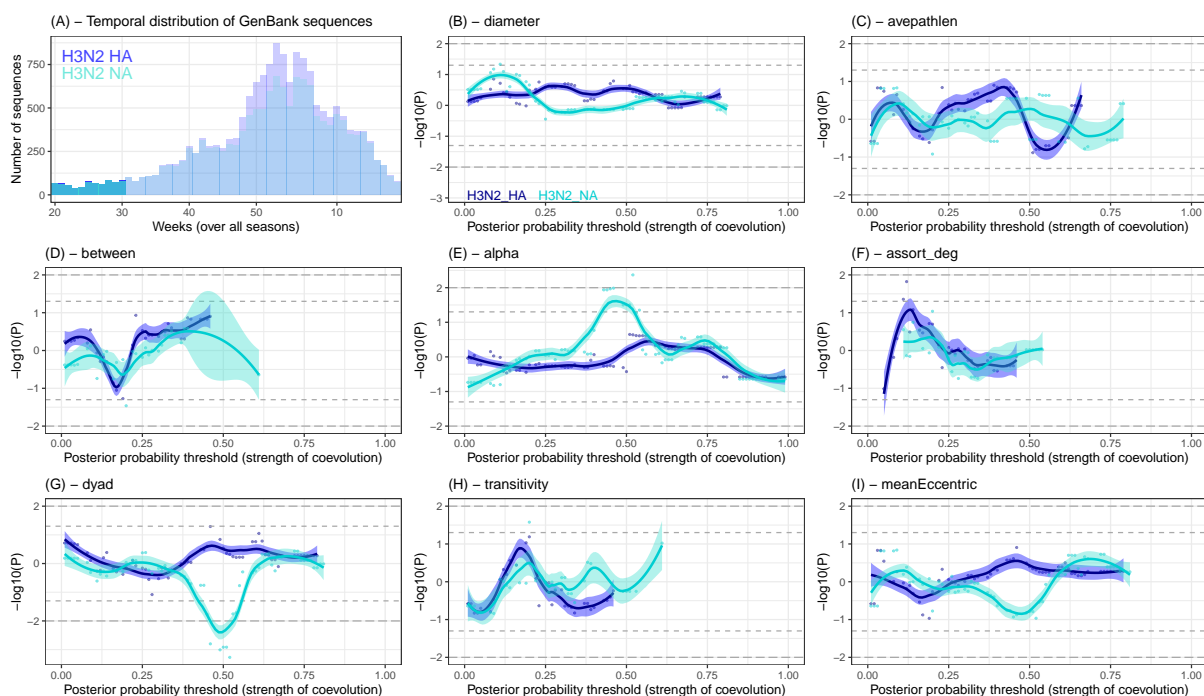

**Figure 2. Network analyses based on genetic data from weeks 20-30 (window 1) for the HA and NA genes in H3N2.** (A) Temporal distribution of sequences deposited in GenBank (shaded hues for window 4, solid colors for the current window) for HA (blue) and NA (turquoise). The next eight panels show the significance of the robust regressions for each network statistic at a particular posterior probability threshold (the strength of coevolution) against total unweighted ILI value. Negative values indicate a negative slope, and vice-versa for positive values. Gray horizontal lines indicate significance thresholds (dash: 5%; long dash: 1%). LOWESS regressions are shown with the 95% confidence envelope for each subtype and each gene: blue for HA, turquoise for NA.

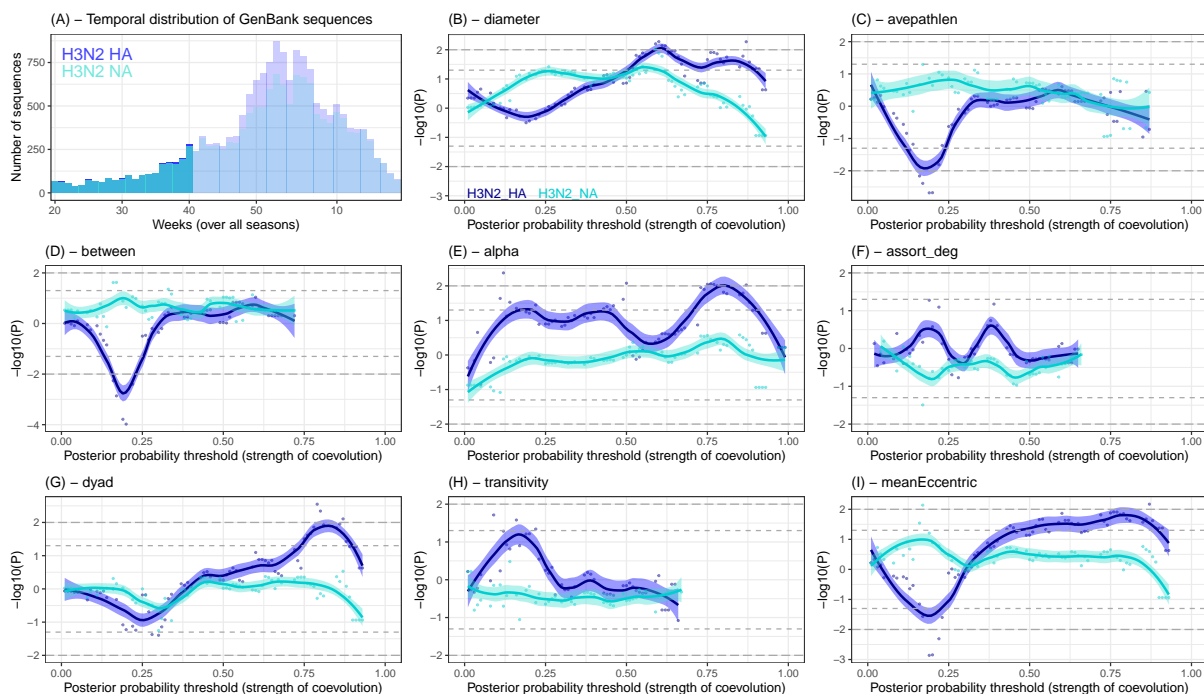

**Figure 3. Network analyses based on genetic data from weeks 20-40 (window 2) for the HA and NA genes in H3N2.** (A) Temporal distribution of sequences deposited in GenBank (shaded hues for window 4, solid colors for the current window) for HA (blue) and NA (turquoise). The next eight panels show the significance of the robust regressions for each network statistic at a particular posterior probability threshold (the strength of coevolution) against total unweighted ILI value. Negative values indicate a negative slope, and vice-versa for positive values. Gray horizontal lines indicate significance thresholds (dash: 5%; long dash: 1%). LOWESS regressions are shown with the 95% confidence envelope for each subtype and each gene: blue for HA, turquoise for NA.

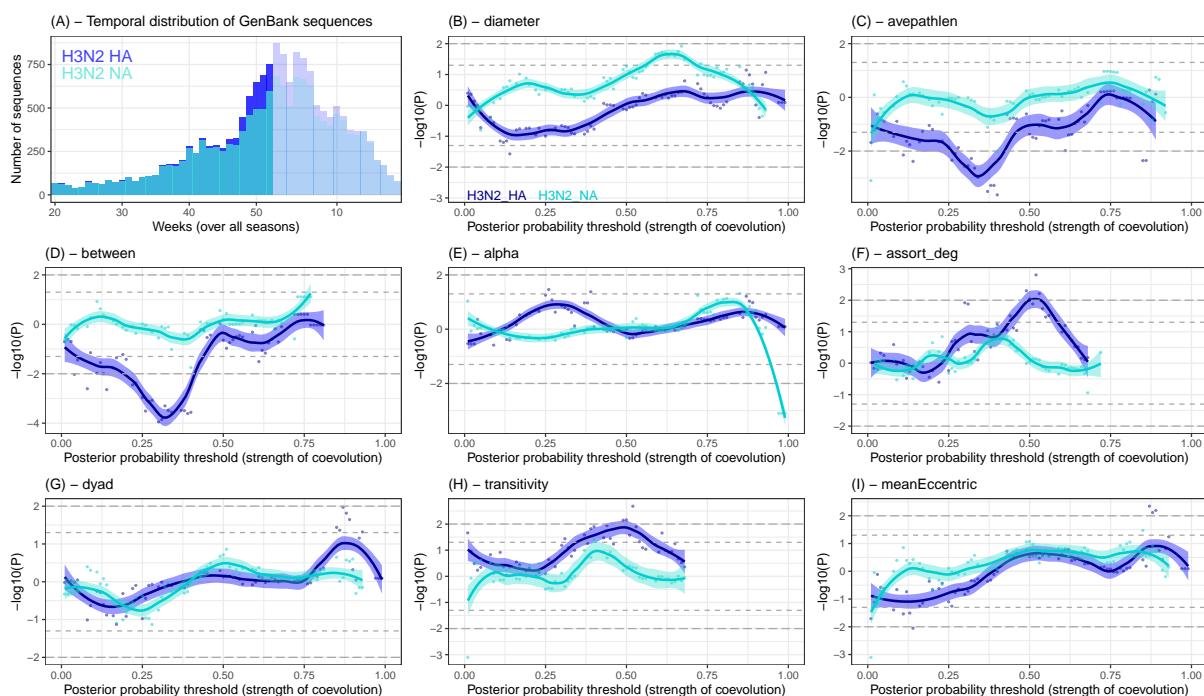

**Figure 4. Network analyses based on genetic data from weeks 20-52 (window 3) for the HA and NA genes in H3N2.** (A) Temporal distribution of sequences deposited in GenBank (shaded hues for window 4, solid colors for the current window) for HA (blue) and NA (turquoise). The next eight panels show the significance of the robust regressions for each network statistic at a particular posterior probability threshold (the strength of coevolution) against total unweighted ILI value. Negative values indicate a negative slope, and vice-versa for positive values. Gray horizontal lines indicate significance thresholds (dash: 5%; long dash: 1%). LOWESS regressions are shown with the 95% confidence envelope for each subtype and each gene: blue for HA, turquoise for NA.

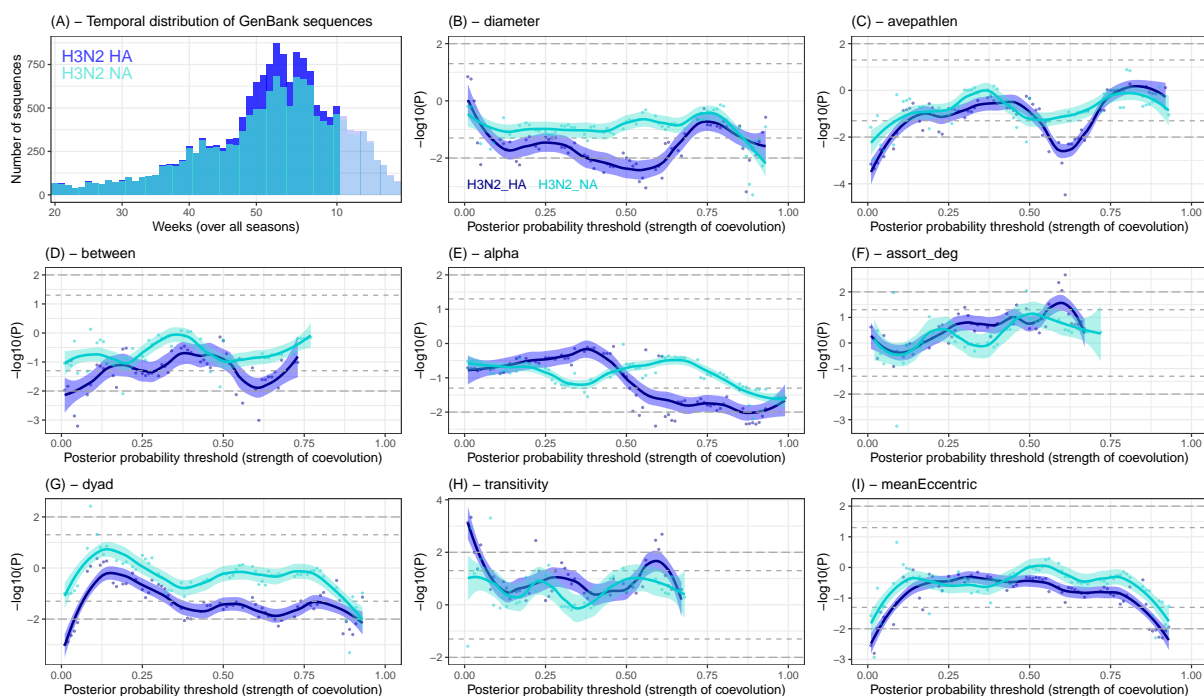

**Figure 5. Network analyses based on genetic data from weeks 20-10 (window 4) for the HA and NA genes in H3N2.** (A) Temporal distribution of sequences deposited in GenBank (shaded hues for window 4, solid colors for the current window) for HA (blue) and NA (turquoise). The next eight panels show the significance of the robust regressions for each network statistic at a particular posterior probability threshold (the strength of coevolution) against total unweighted ILI value. Negative values indicate a negative slope, and vice-versa for positive values. Gray horizontal lines indicate significance thresholds (dash: 5%; long dash: 1%). LOWESS regressions are shown with the 95% confidence envelope for each subtype and each gene: blue for HA, turquoise for NA.
